# Supplementary material
Source: MDPI journal article supplement (https://www.mdpi.com/2076-3417/11/24/11810)

**Supplementary material:**

**Figure S1** : Standard curve for Alpha fetoprotein analysis by ELISA.

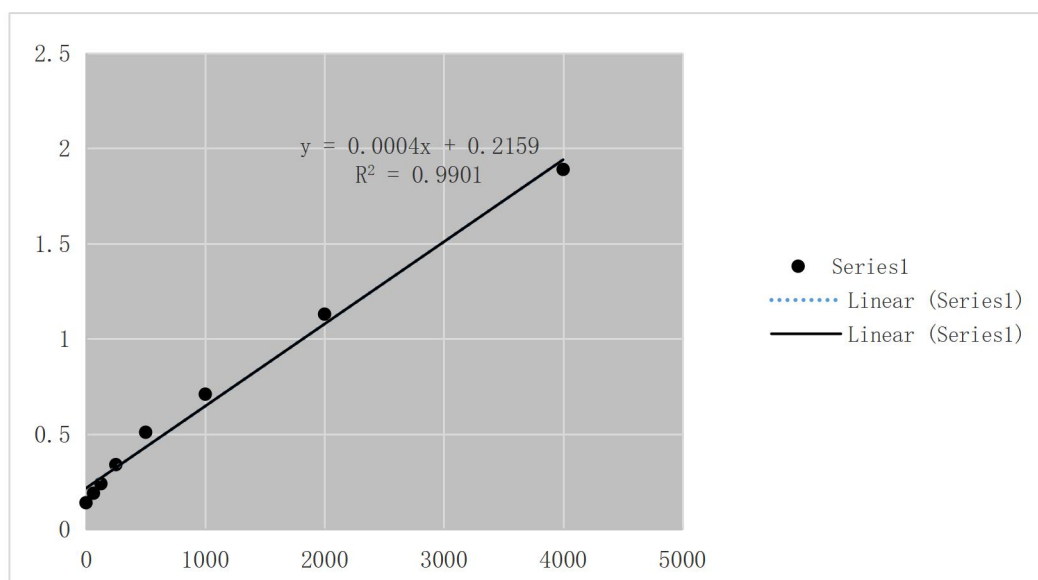

Supplement: s1 [file s1]
